# Supplementary material for: Adsorption of hydrogen sulphide on Metal-Organic Frameworks
Source: Royal Society of Chemistry journal article supplement (doi:10.1039/c3ra41682h), 2013-01-01
Supplement: c3ra41682h.pdf [file c3ra41682h.pdf]

## Supporting Information for

# Adsorption of Hydrogen Sulfide on Metal-Organics Frameworks

*Juan José Gutiérrez-Sevillano,<sup>†</sup> Ana Martín-Calvo,<sup>†</sup> David Dubbeldam,<sup>‡</sup> Sofía Calero,<sup>†</sup> and Said Hamad<sup>†,\*</sup>*

<sup>†</sup> Department of Physical, Chemical and Natural Systems, University Pablo de Olavide, Ctra. Utrera km. 1, 41013, Seville, Spain.

<sup>‡</sup> Van 't Hoff Institute for Molecular Sciences, University of Amsterdam, Science Park, 9041098 XH Amsterdam, Netherlands.

## Table of Contents

|                                                                                                                                                       |   |
|-------------------------------------------------------------------------------------------------------------------------------------------------------|---|
| S1. Influence of the molecular dipole on the adsorption .....                                                                                         | 3 |
| S2. Variation of the average occupation profile with the molecular dipole .....                                                                       | 4 |
| S3. Snapshots of <i>ab initio</i> Molecular Dynamics simulations of H <sub>2</sub> S and H <sub>2</sub> O adsorbed on a cluster model of Cu-BTC ..... | 7 |

## S1. Influence of the molecular dipole on the adsorption

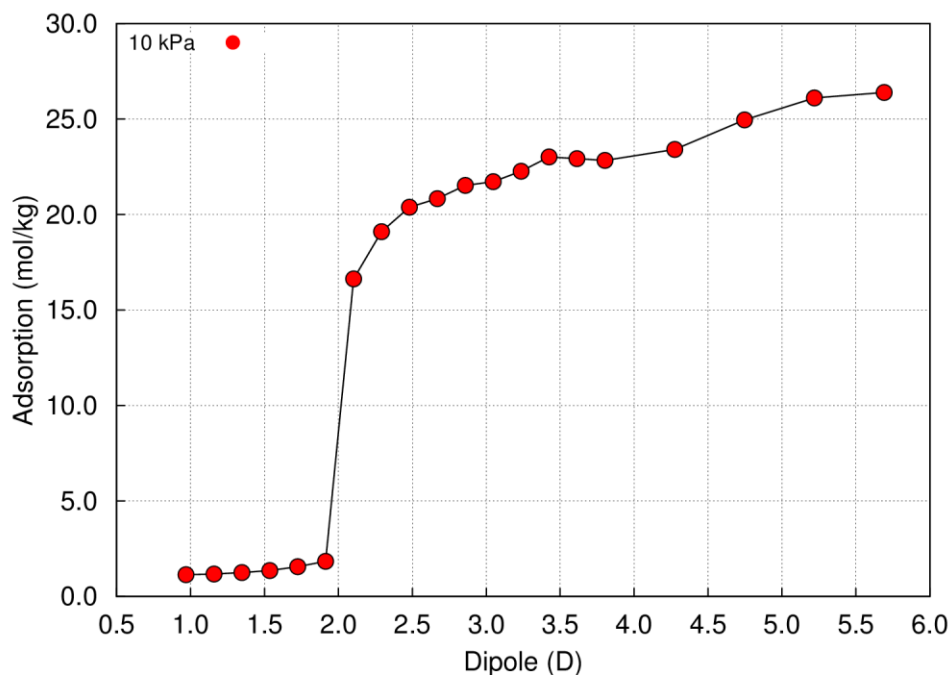

Adsorption of H<sub>2</sub>S in Cu-BTC as a function of the dipole moment of the molecule, employing the 5S force field. The temperature is 300 K and the pressure is 10 kPa.

## S2. Variation of the average occupation profile with the molecular dipole

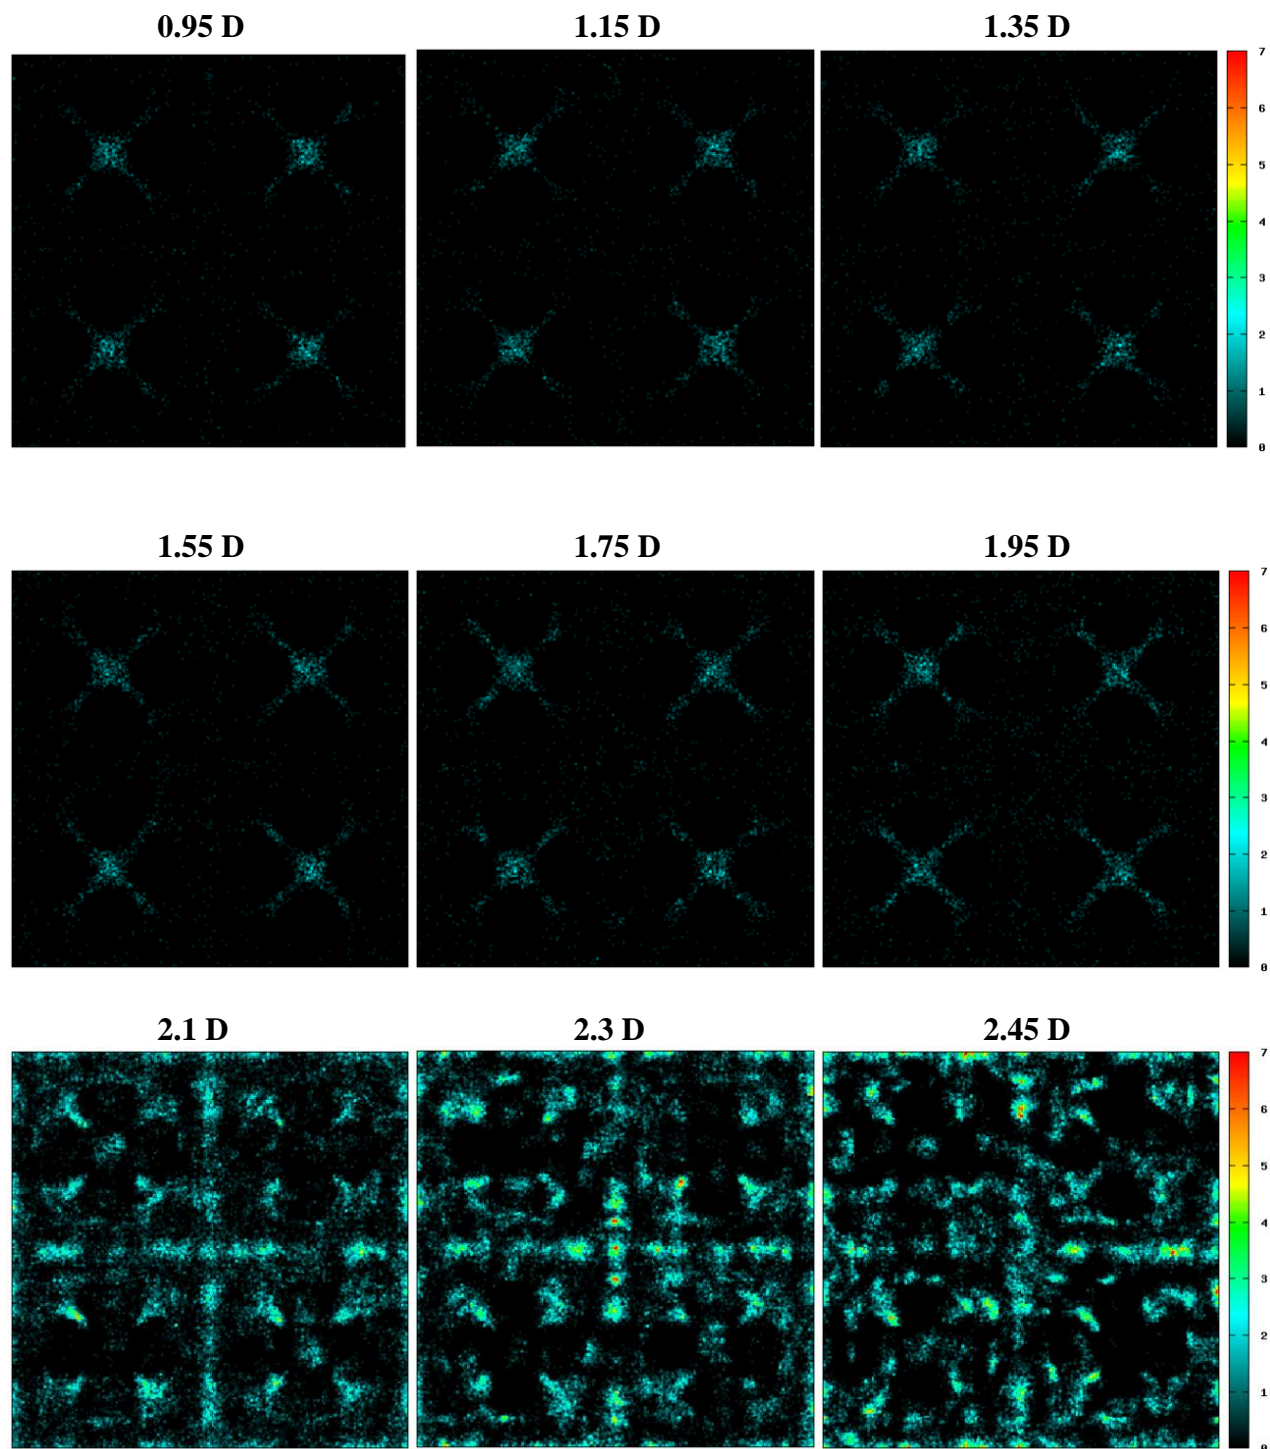

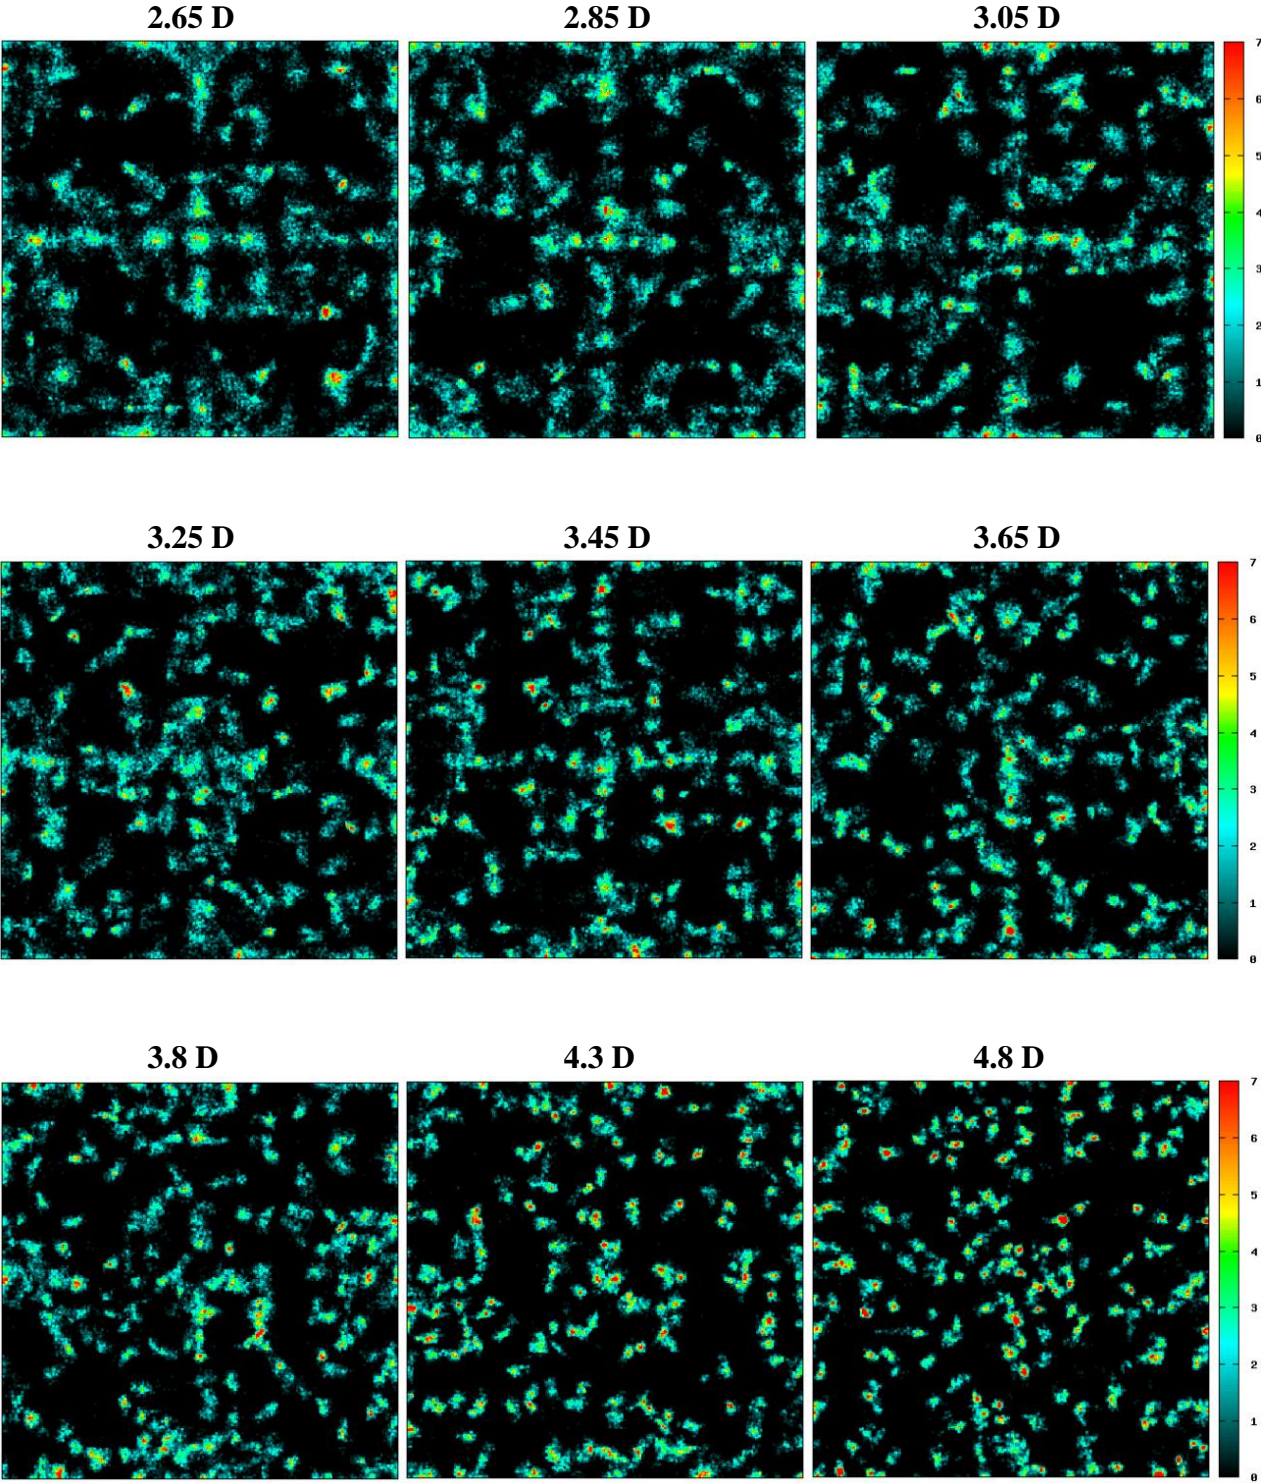



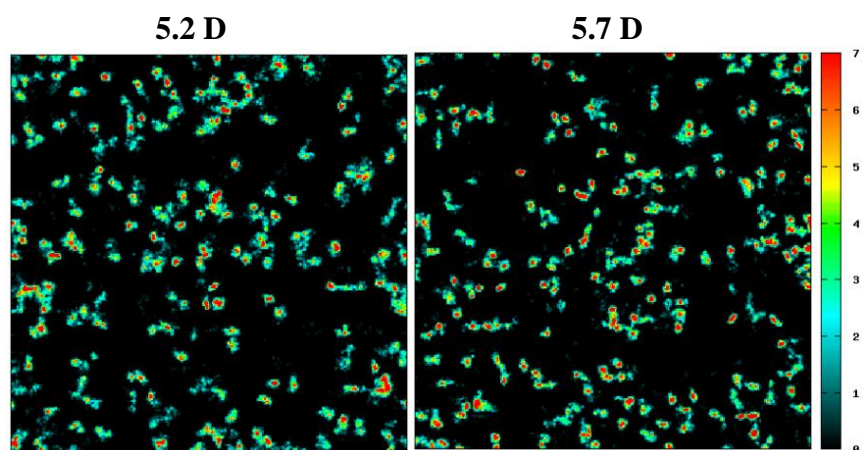

**Variation of the average occupation profiles of the H<sub>2</sub>S centers of mass (at 10 kPa and 300 K) in Cu-BTC, as the molecular dipole changes from 0.95 D to 5.7 D. The force field employed is the five-sites 5S.**

### S3. Snapshots of *ab initio* Molecular Dynamics simulations of H<sub>2</sub>S and H<sub>2</sub>O adsorbed on a cluster model of Cu-BTC

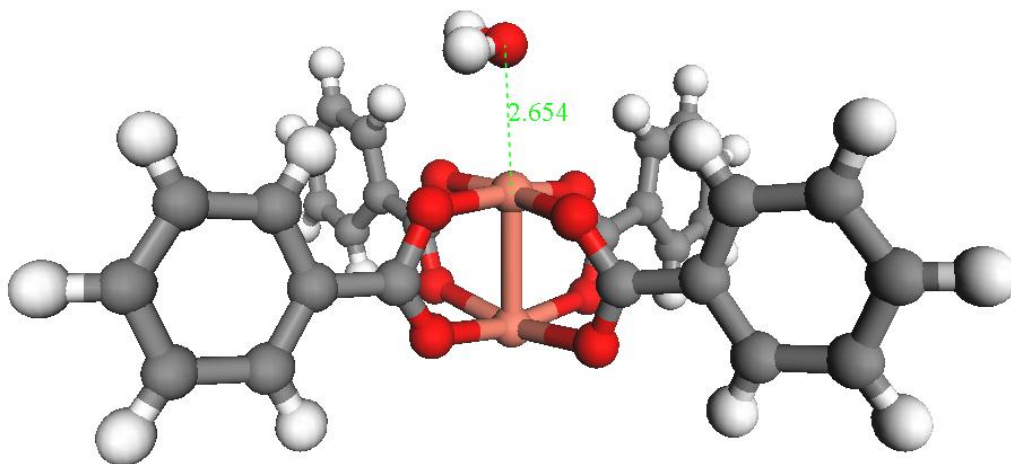

a)

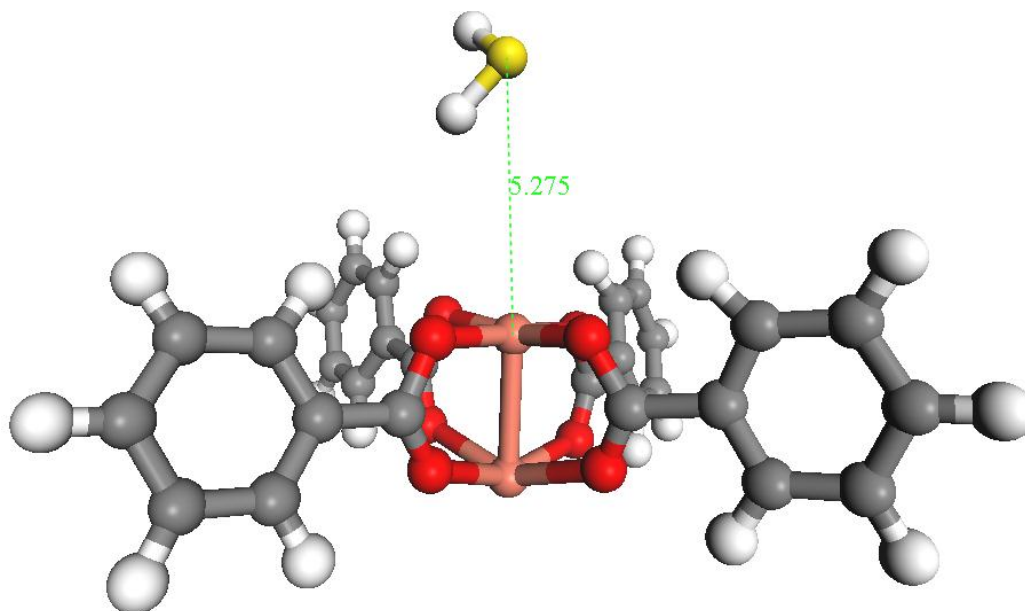

b)

Snapshots of *ab initio* Molecular Dynamics simulations of H<sub>2</sub>O (a) and H<sub>2</sub>S (b) adsorbed on a cluster model of Cu-BTC. The simulations are carried out employing the Gaussian 09 code, with the Atom Centered Density Matrix Propagation molecular dynamics method. The level of theory used is HF/LanL2MB. The calculations were 3 ps long, with a time step was 0.1 fs, and the temperature was 300 K.
